# Supplementary material for: Biaxially extended thiophene–isoindigo donor–acceptor conjugated polymers for high-performance flexible field-effect transistors
Source: Royal Society of Chemistry journal article supplement (doi:10.1039/c6py00726k), 2016-01-01
Supplement: c6py00726k1.pdf [file c6py00726k1.pdf]

*Electronic Supplementary Information*

**Biaxially Extended Thiophene-Isoindigo Donor-Acceptor Conjugated  
Polymers for High-Performance Flexible Field-Effect Transistors**

Hung-Chin Wu,<sup>†</sup> Chian-Wen Hong,<sup>†</sup> and Wen-Chang Chen<sup>\*</sup>

Department of Chemical Engineering, National Taiwan University,

Taipei 10617, Taiwan

<sup>†</sup> H.-C. Wu and C.-W. Hong contributed equally to this work

Tel: 886-2-23628398, Fax: 886-2-23623040

E-mail: chenwc@ntu.edu.tw

**Table S1.** Relevant Crystallographic Properties for the Studied Polymer Thin Films

| Polymer   | Lamellar spacing (Å) | In-plane $\pi$ - $\pi$ stacking distance (Å) |
|-----------|----------------------|----------------------------------------------|
| PIIT4T    | 23.4                 | -                                            |
| PIIT4TSi  | 26.5                 | 3.59                                         |
| PII2T4T   | 21.8                 | 4.13                                         |
| PII2T4TSi | 23.9                 | 3.58                                         |
| PII2T8T   | -                    | -                                            |
| PII2T8TSi | 29.4                 | -                                            |

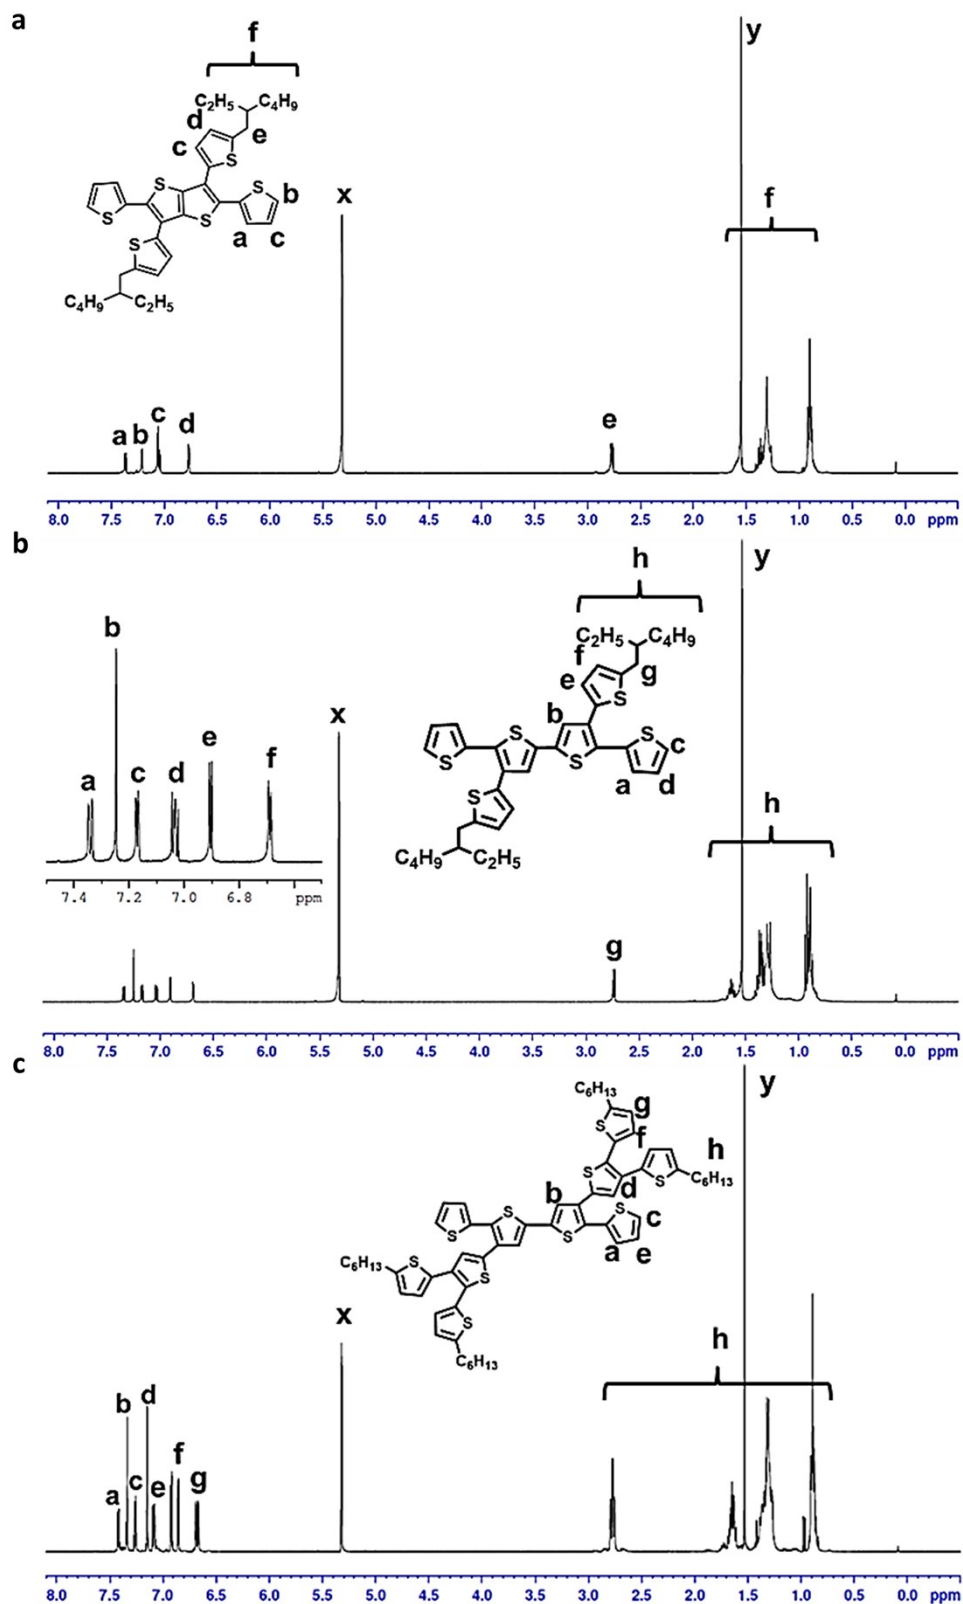

**Fig. S1.**  $^1\text{H-NMR}$  spectrum of (a) TT4T, (b) 2T4T, and (c) 2T8T in  $\text{CD}_2\text{Cl}_2$  (x:  $\text{CD}_2\text{Cl}_2$ , y:  $\text{H}_2\text{O}$ ).

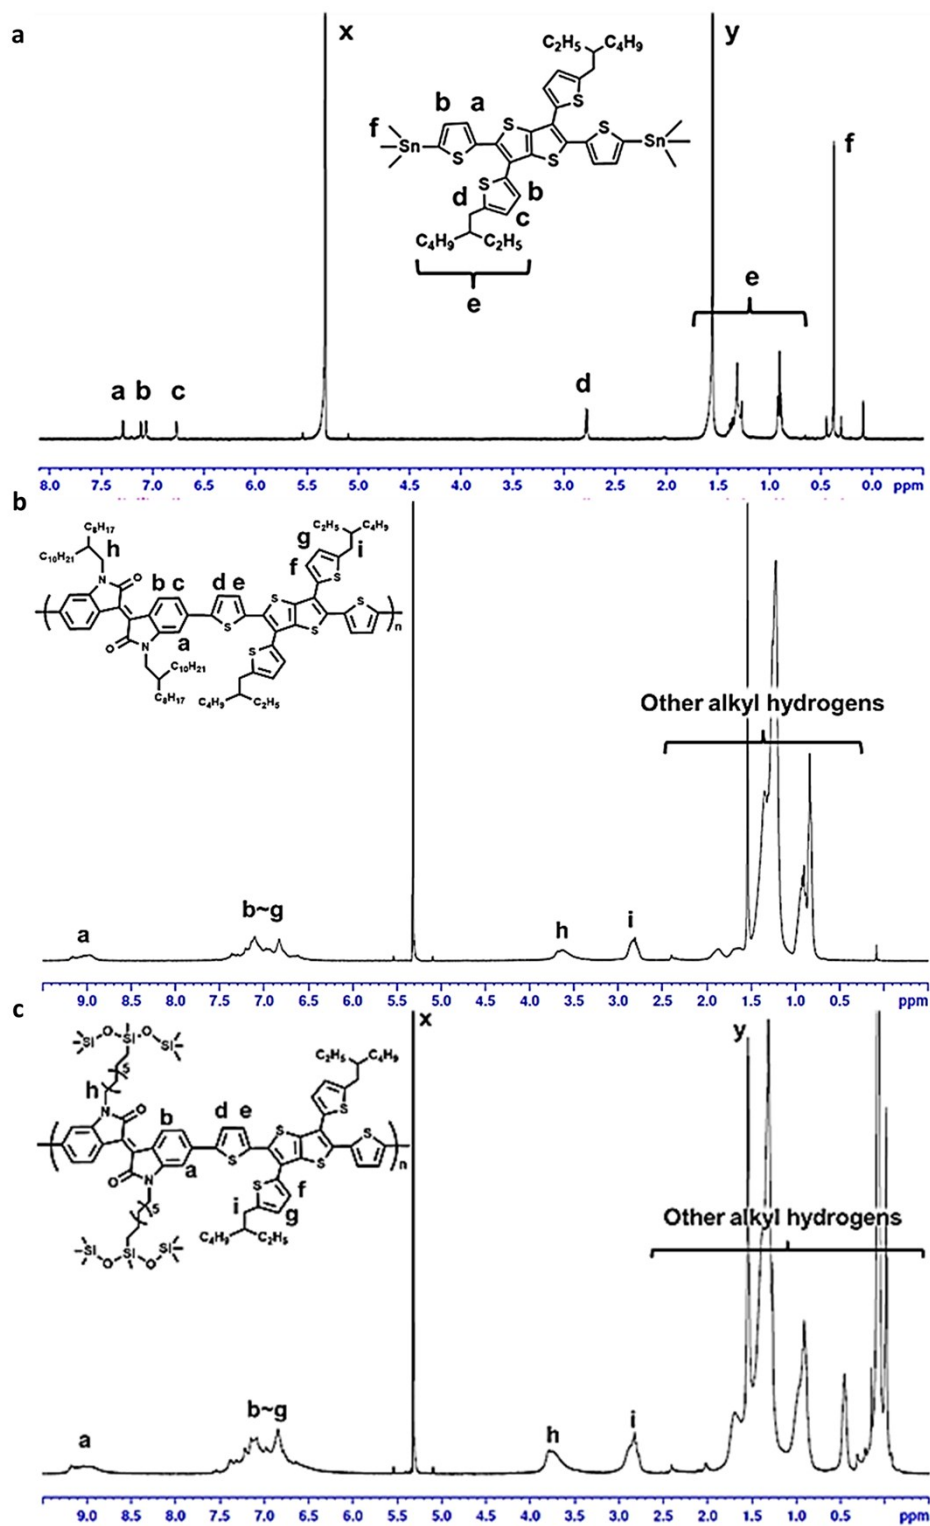

**Fig. S2.**  $^1\text{H-NMR}$  spectrum of (a) TT4T-ditin, (b) PIITT4T, and (c) PIITT4TSi in  $\text{CD}_2\text{Cl}_2$  (x:  $\text{CD}_2\text{Cl}_2$ ; y:  $\text{H}_2\text{O}$ ).

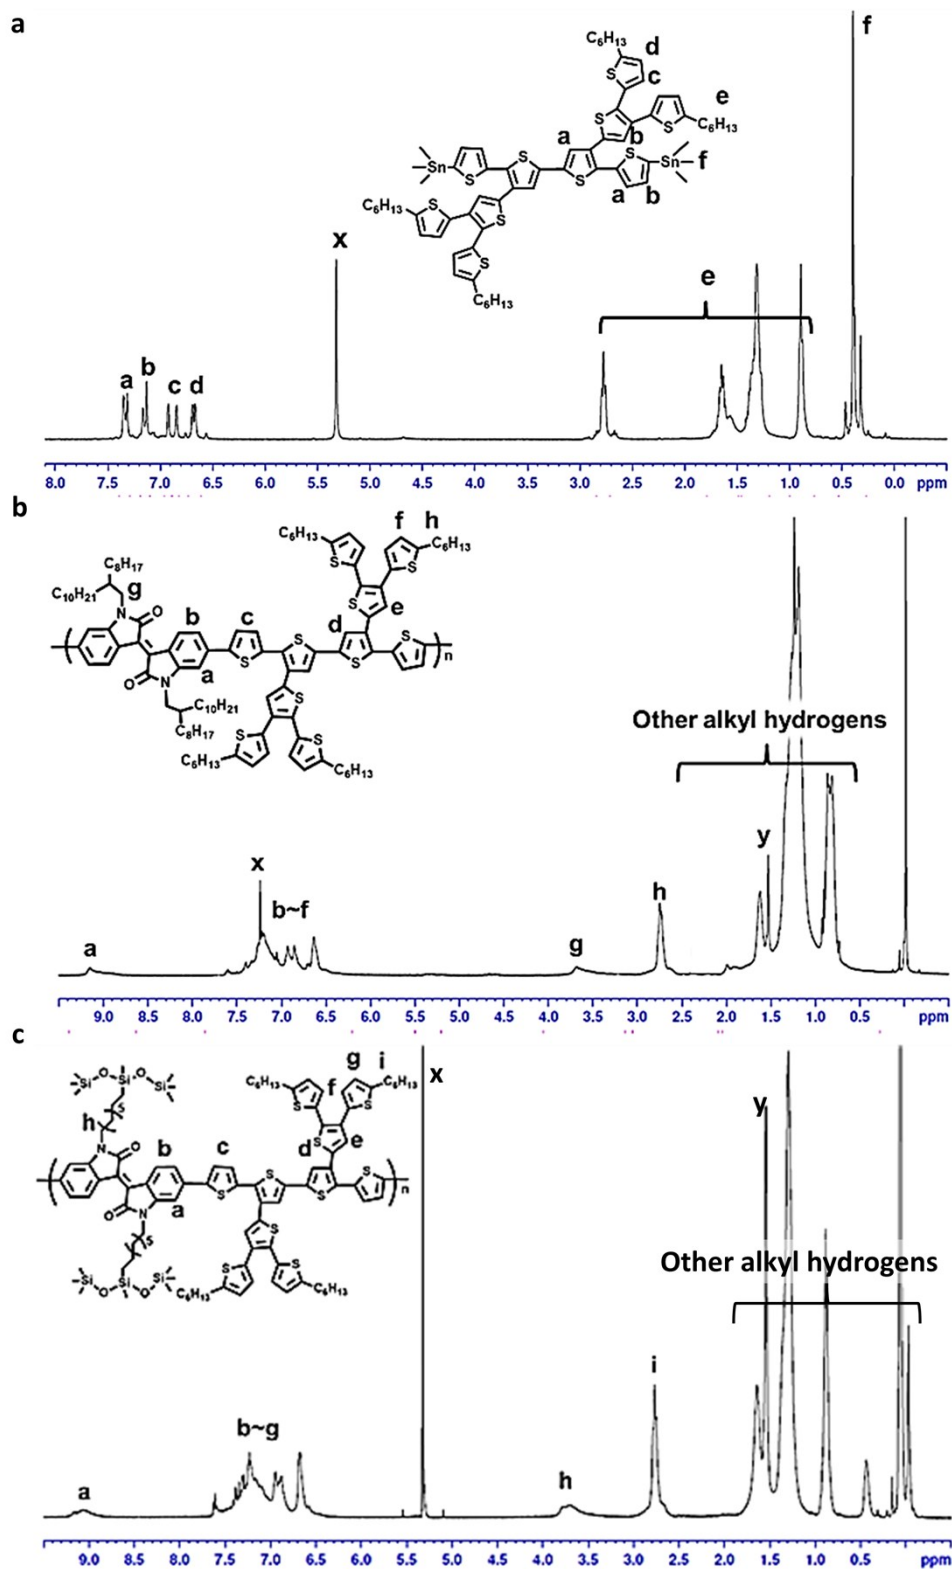

**Fig. S3.**  $^1\text{H-NMR}$  spectrum of (a) 2T8T-ditin in  $\text{CD}_2\text{Cl}_2$  (x:  $\text{CD}_2\text{Cl}_2$ ; y:  $\text{H}_2\text{O}$ ), (b) PII2T8T in  $\text{CDCl}_3$  (x:  $\text{CDCl}_3$ ; y:  $\text{H}_2\text{O}$ ), and (c) PII2T8TSi in  $\text{CD}_2\text{Cl}_2$  (x:  $\text{CD}_2\text{Cl}_2$ ; y:  $\text{H}_2\text{O}$ ).

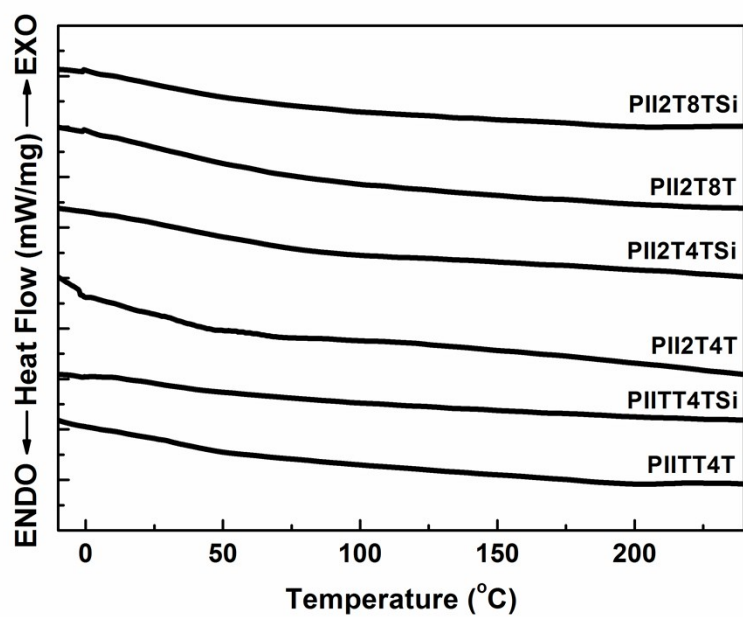

Fig. S4. DSC curves of the studied polymers under a nitrogen atmosphere.

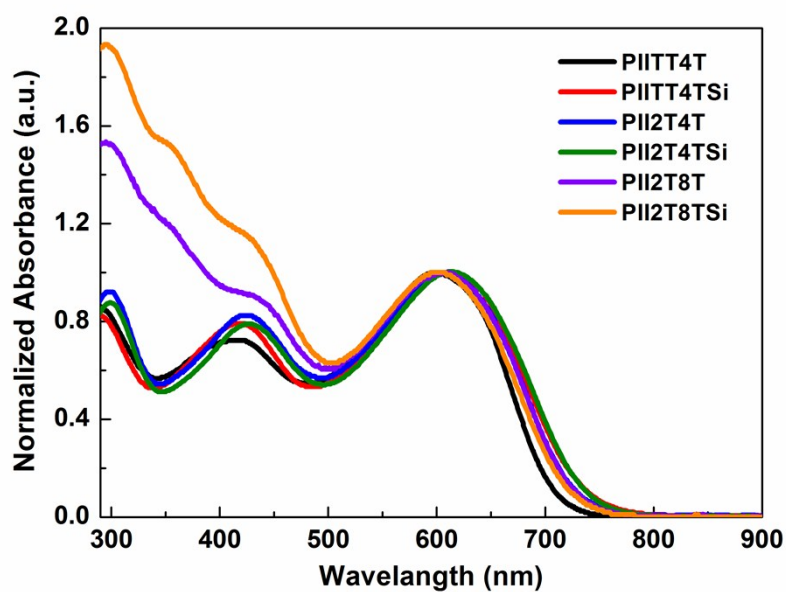

Fig. S5. UV-Vis absorption spectra of the studied polymers in dilute chloroform solution.

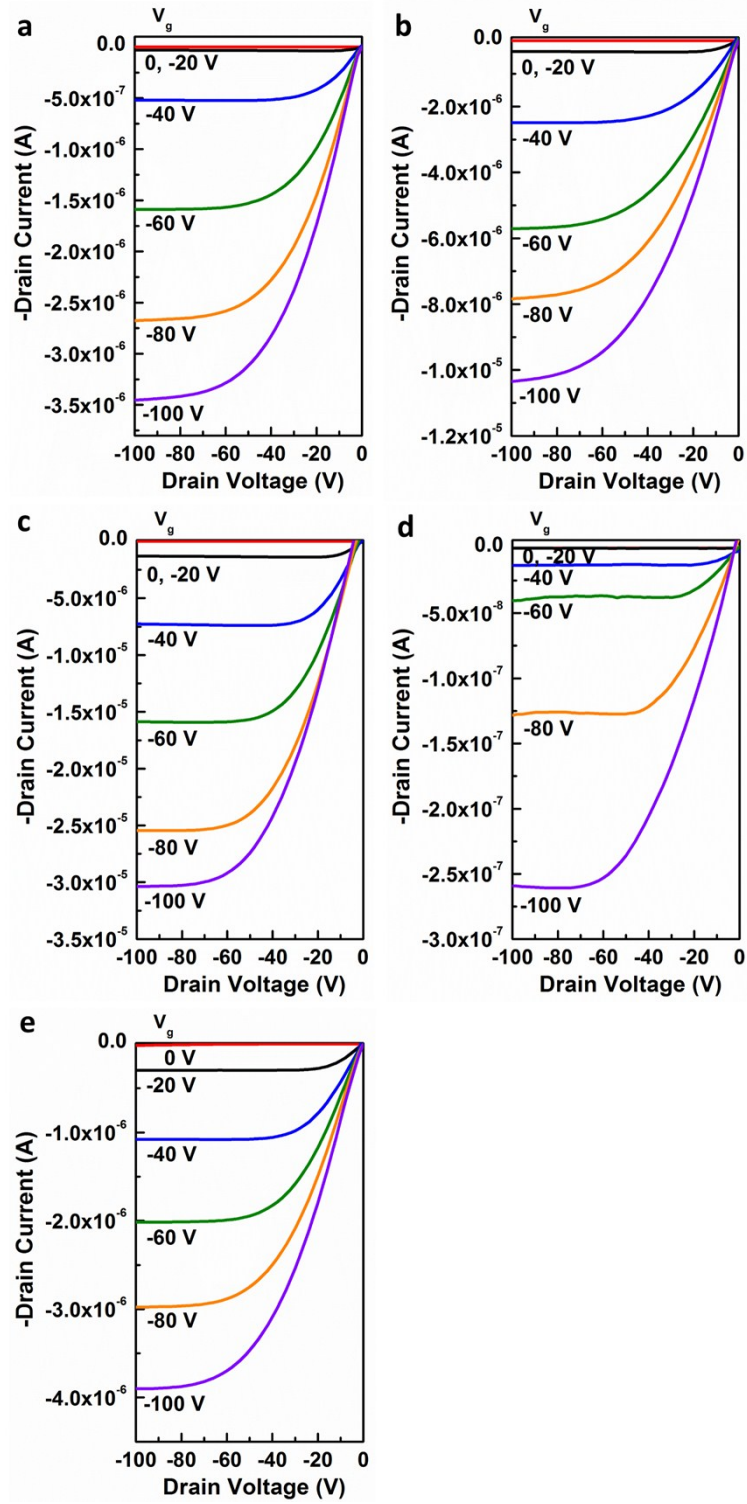

**Fig. S6.** FET output curves of (a) PIITT4T-, (b) PIITT4TSi-, (c) PII2T4T-, (d) PII2T8T-, and (e) PII2T8TSi-based device, respectively.
